# Supplementary material for: An automated materials screening approach for the development of sol–gel derived monolithic silica enzyme reactor columns
Source: Royal Society of Chemistry journal article supplement (doi:10.1039/c4ra00734d), 2014-03-28
Supplement: c4ra00734d1.pdf [file c4ra00734d1.pdf]

## SUPPORTING INFORMATION

### **An Automated Materials Screening Approach for the Development of Sol-Gel Derived Monolithic Silica Enzyme Reactor Columns**

Anne Marie E. Smith, Jordan Fortuna, Erica M. Forsberg and John D. Brennan\*

Biointerfaces Institute and Department of Chemistry & Chemical Biology, McMaster University,  
Hamilton, Ontario, Canada, L8S 4L8.

\*Author to whom correspondence should be addressed

Tel: (905) 525-9140 (ext. 20682)

E-mail: [brennanj@mcmaster.ca](mailto:brennanj@mcmaster.ca)

Internet: [brennanlab.ca](http://brennanlab.ca); [biointerfaces.mcmaster.ca](http://biointerfaces.mcmaster.ca)

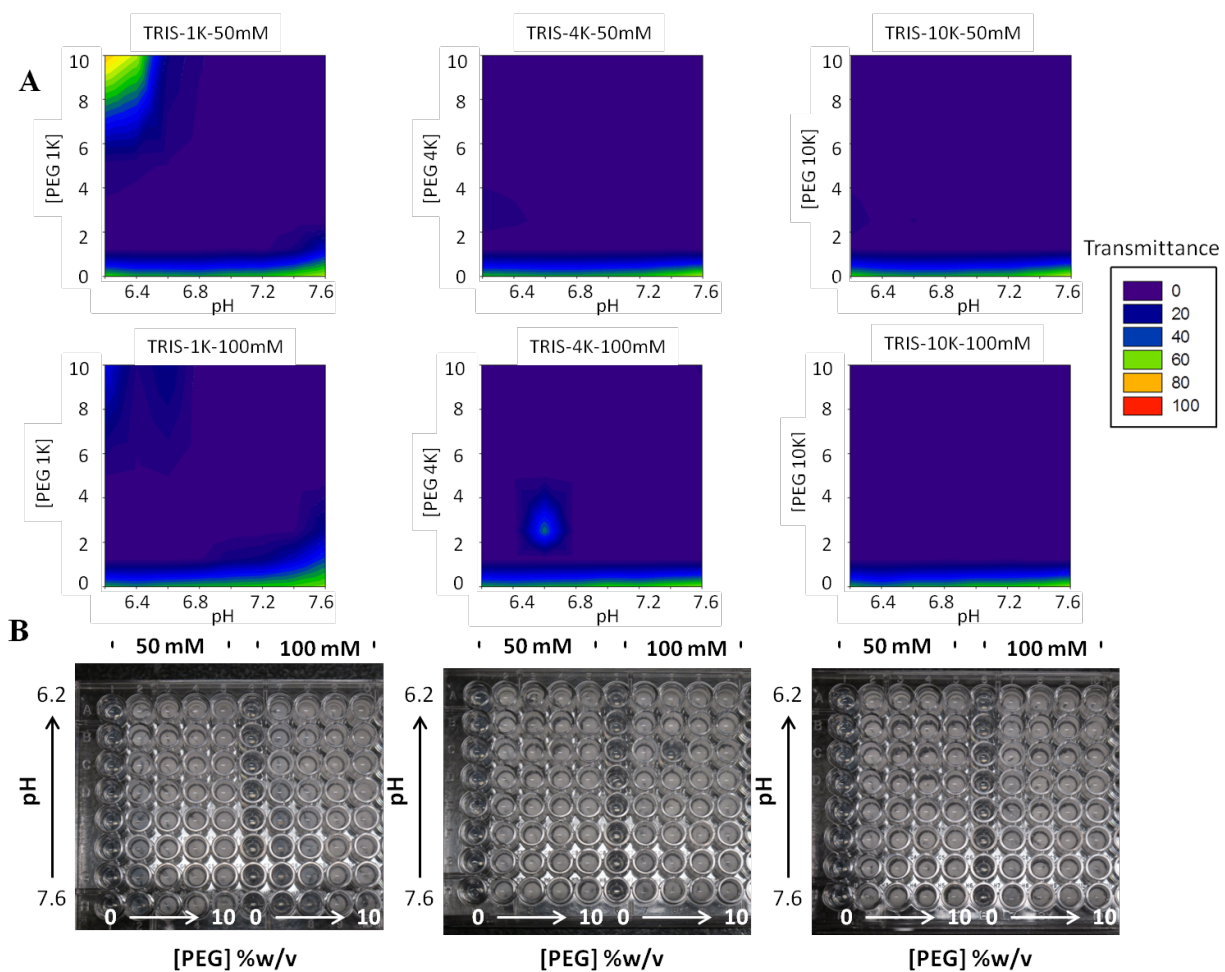

**Figure S1:** A) Opacity plots of a selection of materials tested involving the use of TRIS buffer. Scale bar indicates % transmittance. B) Optical images of materials showing a range in opacity.

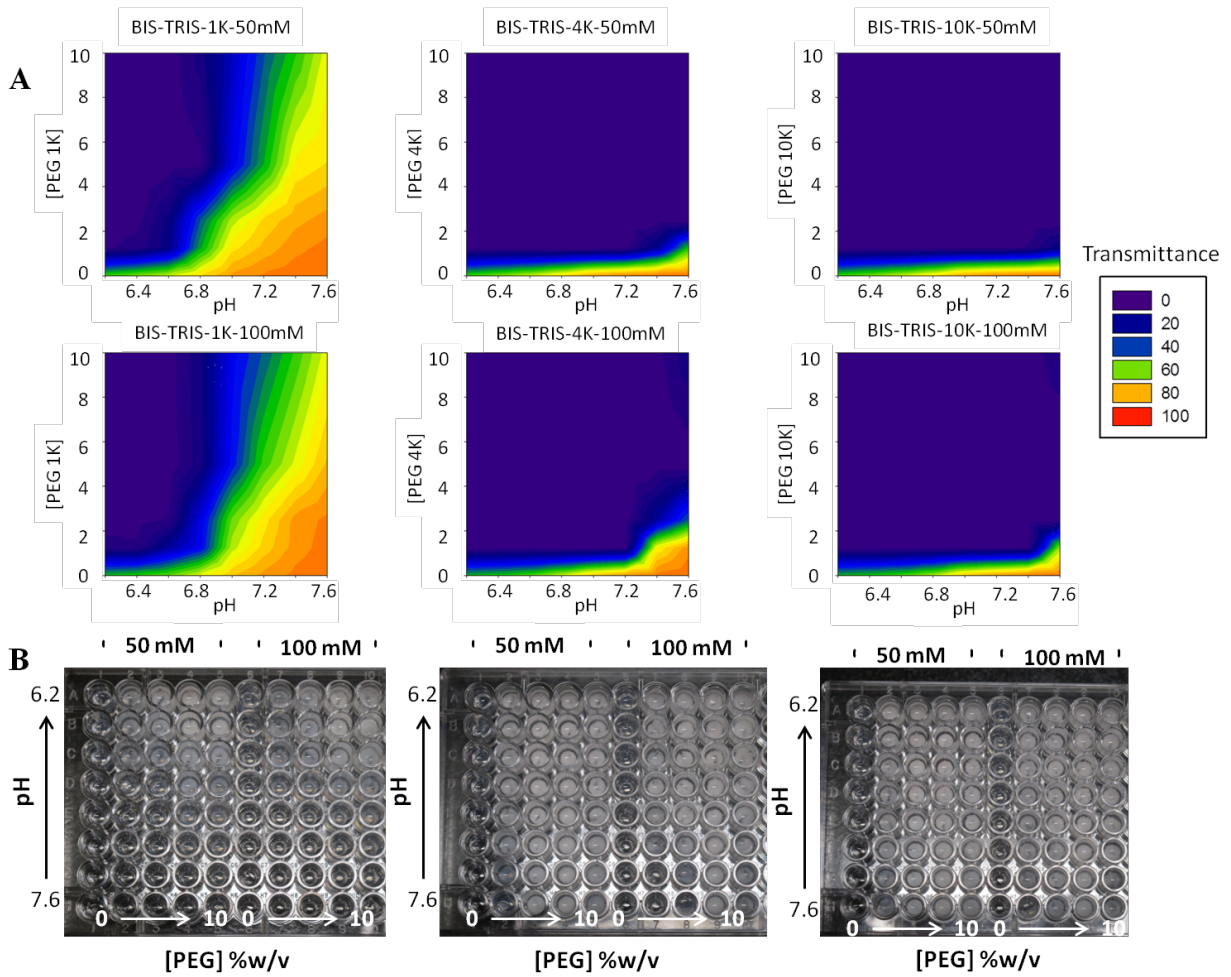

**Figure S2:** A) Opacity plots of a selection of materials tested involving the use of BIS-TRIS buffer. Scale bar indicates % transmittance. B) Optical images of materials showing a range in opacity.

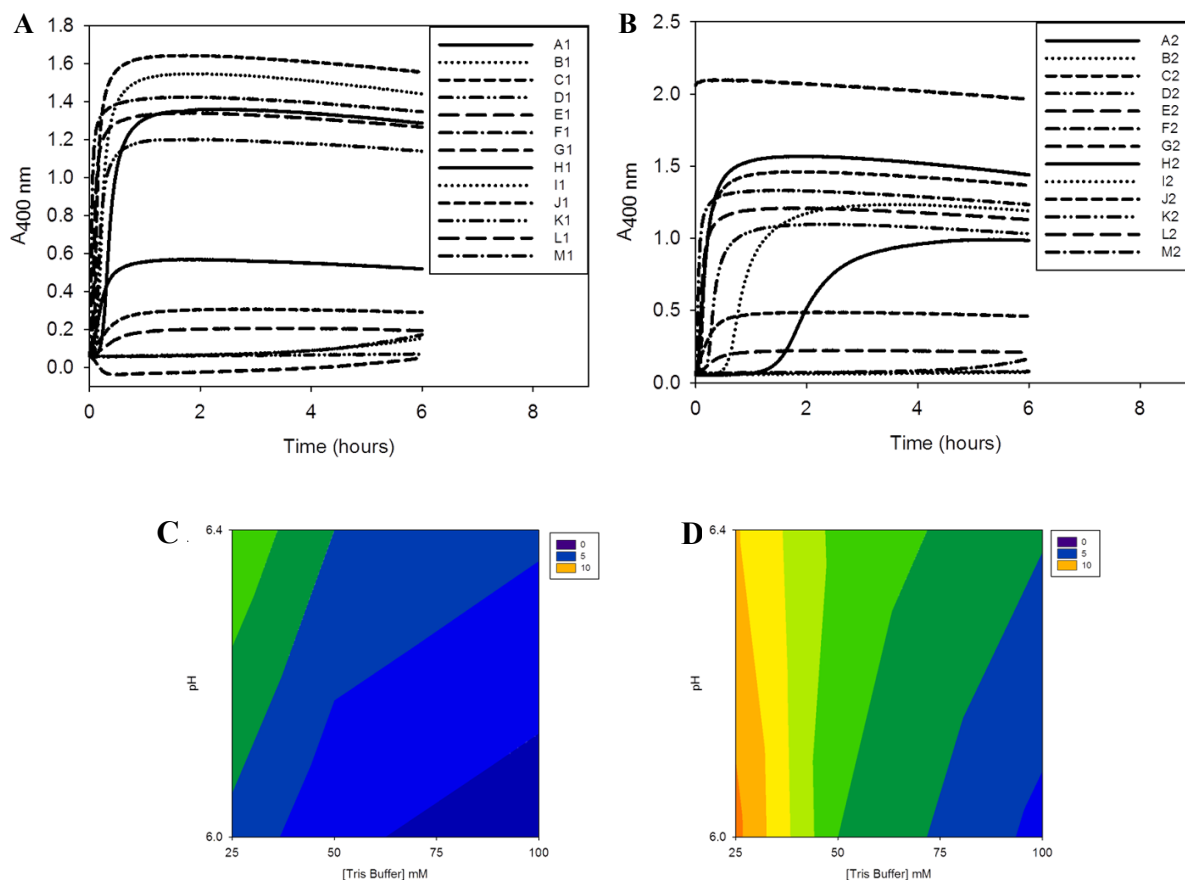

**E**

| Sample Name | Buffer | [Buffer] mM | pH buffer | PEG MW Da | [PEG] % |
|-------------|--------|-------------|-----------|-----------|---------|
| A (1,2)     | Hepes  | 100         | 6.2       | 1000      | 1.25    |
| B (1,2)     | Hepes  | 100         | 6.2       | 1000      | 10      |
| C (1,2)     | Hepes  | 25          | 7.0       | 1000      | 1.25    |
| D (1,2)     | Hepes  | 25          | 7.0       | 1000      | 10      |
| E (1,2)     | Hepes  | 50          | 7.0       | 1000      | 1.25    |
| F (1,2)     | Hepes  | 50          | 7.0       | 1000      | 10      |
| G (1,2)     | Hepes  | 50          | 8.0       | 10,000    | 1.25    |
| H (1,2)     | Tris   | 25          | 6.0       | 600       | 1.25    |
| I (1,2)     | Tris   | 50          | 6.0       | 600       | 1.25    |
| J (1,2)     | Tris   | 100         | 6.0       | 600       | 1.25    |
| K (1,2)     | Tris   | 25          | 6.4       | 600       | 1.25    |
| L (1,2)     | Tris   | 50          | 6.4       | 600       | 1.25    |
| M (1,2)     | Tris   | 100         | 6.4       | 600       | 1.25    |

Samples denoted with a “1” contain no glycerol, samples denoted with a “2” contain 12.5% glycerol.

**Figure S3:** Kinetic study of a selection of materials showing varying ranges of phase separation onset and resulting in various opacities for A) materials in the absence of glycerol and B) materials in the presence of glycerol. Opacity plots of a selection of materials tested for PEG 600 1.25 % in C) absence of glycerol and D) presence of 12.5% glycerol. Scale bar indicates % transmittance. E) Table of material formulations used in glycerol study.

| Sample       | Buffer | [Buffer]<br>mM | Buffer<br>pH | PEG<br>MW<br>(Da) | [PEG]<br>% | Pc (psi)<br>1 $\mu$ L/min | Pc (psi)<br>5 $\mu$ L/min | Pc (psi)<br>10 $\mu$ L/min |
|--------------|--------|----------------|--------------|-------------------|------------|---------------------------|---------------------------|----------------------------|
| <b>Blank</b> | --     | --             | --           | --                | --         | 154                       | 232                       | 302                        |
| <b>i</b>     | HEPES  | 100            | 6.2          | 1000              | 10         | 950                       | --                        | --                         |
| <b>ii</b>    | HEPES  | 50             | 6.2          | 1000              | 10         | 275                       | 360                       | 460                        |
| <b>iii</b>   | HEPES  | 50             | 7.0          | 1000              | 10         | 194*                      | --                        | --                         |
| <b>iv</b>    | TRIS   | 100            | 6.4          | 600               | 1.25       | >3500                     | --                        | --                         |

**Table S1:** Table of backpressure readings performed on the Eksigent NanoLC for materials used for SEM imaging. \* indicates material excreted from capillary.

A

| Sample | Bulk Particle Density (g/cc) | Macropore Volume (%) | Mesopore Volume (%) |
|--------|------------------------------|----------------------|---------------------|
| i      | 0.5                          | 8                    | 92                  |
| ii     | 0.7                          | 30                   | 70                  |
| iii    | 0.3                          | 98                   | 1                   |
| iv     | 1.12                         | 1                    | 99                  |

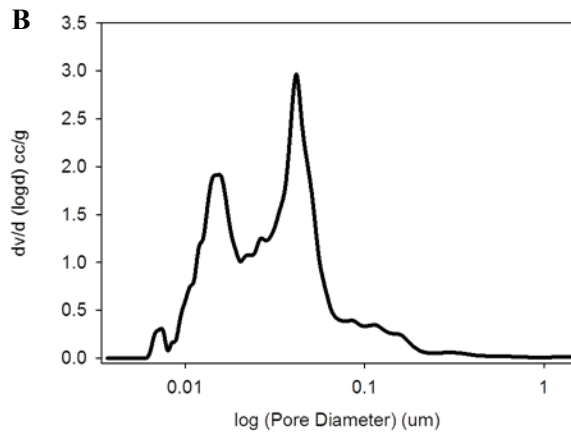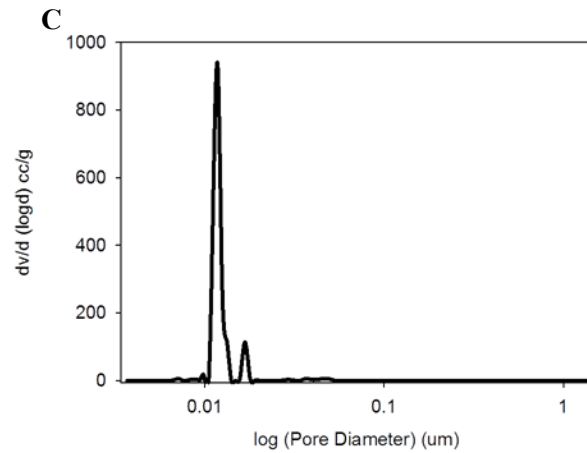

**Figure S4:** A) Mercury porosimetry data obtained for materials shown in backpressure and SEM studies. Pore size distribution curves for B) Material ii, and C) Material iv.

| <b>Monolith #</b> | <b>[TRIS]<br/>(mM)</b> | <b>[PEG 600] (%<br/>w/v)</b> | <b>pH</b> |
|-------------------|------------------------|------------------------------|-----------|
| 1                 | 25                     | 1.25                         | 6.0       |
| 2                 | 25                     | 1.25                         | 6.4       |
| 3                 | 50                     | 1.25                         | 6.0       |
| 4                 | 50                     | 1.25                         | 6.4       |
| 5                 | 100                    | 1.25                         | 6.0       |
| 6                 | 100                    | 1.25                         | 6.4       |

**Table S2:** Table of compositions tested for leaching and activity of AChE.
